# Supplementary material
Source: MDPI journal article supplement (https://www.mdpi.com/2071-1050/15/8/6667)
Supplement: s1 [file s1]

# Supplementary Material

## Overview

In the supplementary materials, we have provided images of materials and some experimental data tables to further support the results and analysis presented in this article.

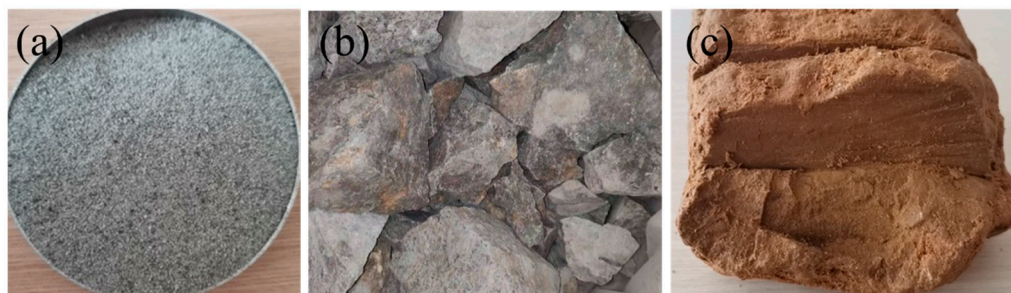

Figure S1. Cover material: (a) tailing; (b) waste rock; (c) HDS clay

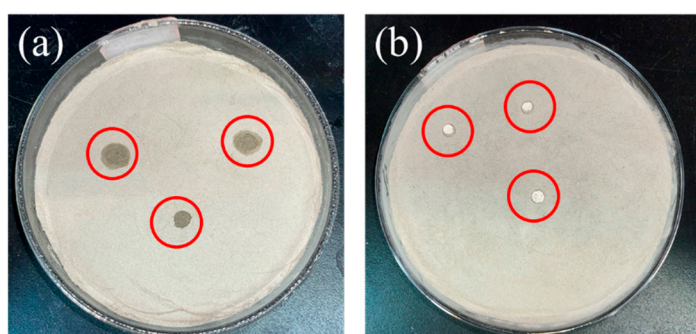

Figure S2. WDPT test: (a) waste rock; (b) coated waste rock

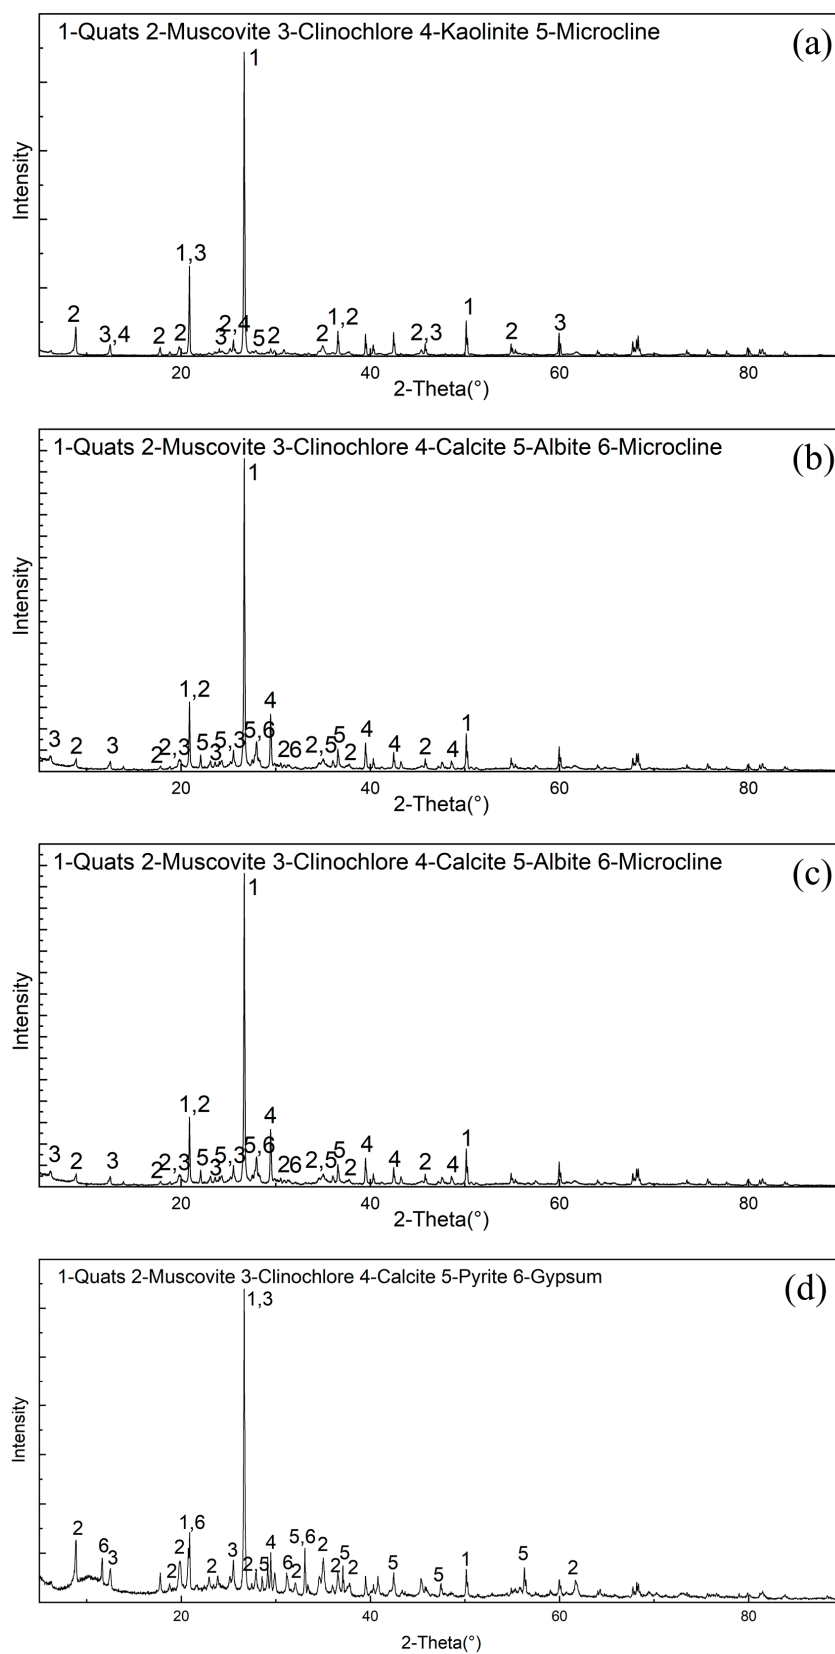

Figure S3. XRD pattern: (a) tailing; (2) HDS clay; (c) waste rock; (d) coated waste rock

Table S1. Data of grain size distribution curve (CGS)

| Particle size (mm) | Percentage passing (%) |
|--------------------|------------------------|
| 20                 | 99.46                  |
| 10                 | 94.56                  |
| 5                  | 47.63                  |
| 2                  | 24.88                  |
| 1                  | 17.80                  |
| 0.5                | 10.73                  |
| 0.25               | 6.95                   |
| 0.075              | 3.67                   |

Table S2. Data of grain size distribution curve (HDS clay)

| Particle size (mm) | Percentage passing (%) |
|--------------------|------------------------|
| 0.3162             | 100.00                 |
| 0.1380             | 96.40                  |
| 0.0603             | 92.08                  |
| 0.0263             | 82.74                  |
| 0.0115             | 65.46                  |
| 0.0050             | 39.91                  |
| 0.0022             | 17.52                  |
| 0.0010             | 7.10                   |
| 0.0004             | 1.62                   |
| 0.0002             | 0.01                   |

Table S3. Data of grain size distribution curve (FGS)

| Particle size (mm) | Percentage passing (%) |
|--------------------|------------------------|
| 1.0000             | 99.66                  |
| 0.4786             | 97.82                  |
| 0.2754             | 82.96                  |
| 0.1820             | 62.51                  |
| 0.1202             | 42.54                  |
| 0.0603             | 23.15                  |
| 0.0302             | 15.30                  |
| 0.0151             | 10.69                  |
| 0.0033             | 3.23                   |
| 0.0011             | 0.30                   |
